# Supplementary material for: A Comparison of SARC-F, Calf Circumference, and Their Combination for Sarcopenia Screening among Patients Undergoing Peritoneal Dialysis
Source: MDPI journal article supplement (doi:10.3390/nu14050923), 2022-02-22
Supplement: s1 [file s1]

**Table S1.** The diagnostic performance of SARC-F, SARC-CalF, and CC on sarcopenia based on four operational definitions, stratified by age ( $\geq 60$  or  $< 60$  years).

| Definitions | AUC (95% CI)                       |                                    |
|-------------|------------------------------------|------------------------------------|
|             | Age $\geq 60$ years ( $n = 82$ )   | Age $< 60$ years ( $n = 104$ )     |
| AWGS 2019   |                                    |                                    |
| CC          | 0.816 (0.715–0.893) <sup>b</sup>   | 0.800 (0.710–0.872) <sup>a,b</sup> |
| SARC-CalF   | 0.756 (0.649–0.844) <sup>c</sup>   | 0.680 (0.581–0.768) <sup>a,c</sup> |
| SARC-F      | 0.598 (0.484–0.705) <sup>b,c</sup> | 0.518 (0.418–0.617) <sup>b,c</sup> |
| EWGSOP2     |                                    |                                    |
| CC          | 0.765 (0.659–0.852) <sup>b</sup>   | 0.762 (0.669–0.840)                |
| SARC-CalF   | 0.727 (0.618–0.820) <sup>c</sup>   | 0.714 (0.617–0.799)                |
| SARC-F      | 0.581 (0.466–0.689) <sup>b,c</sup> | 0.613 (0.512–0.707)                |
| FNIH        |                                    |                                    |
| CC          | 0.577 (0.463–0.686)                | 0.689 (0.591–0.776)                |
| SARC-CalF   | 0.546 (0.432–0.657)                | 0.726 (0.630–0.809)                |
| SARC-F      | 0.531 (0.417–0.642)                | 0.584 (0.483–0.680)                |
| IWGS        |                                    |                                    |
| CC          | 0.832 (0.733–0.905) <sup>b</sup>   | 0.642 (0.543–0.734) <sup>a</sup>   |
| SARC-CalF   | 0.799 (0.696–0.880) <sup>c</sup>   | 0.536 (0.436–0.634) <sup>a</sup>   |
| SARC-F      | 0.638 (0.525–0.742) <sup>b,c</sup> | 0.533 (0.433–0.632)                |

AUC, area under curve; CI, confidence interval; CC, calf circumference; SARC-F, strength, assistance walking, rise from a chair, climb stairs, and falls; SARC-CalF, SARC-F combined with calf circumference; AWGS, Asian Working Group for Sarcopenia; CC, calf circumference; EWGSOP, European Working Group on Sarcopenia in Older People; FNIH, Foundation for the National Institutes of Health; IWGS, International Working Group on Sarcopenia. <sup>a</sup>  $p < 0.05$  indicates significant difference of AUCs between CC and SARC-CalF. <sup>b</sup>  $p < 0.05$  indicates significant difference of AUCs between CC and SARC-F. <sup>c</sup>  $p < 0.05$  indicates significant difference of AUCs between SARC-CalF and SARC-F.

**Table S2.** The diagnostic performance of SARC-F, SARC-CalF, and CC on sarcopenia based on four operational definitions, stratified by PD duration ( $\geq 45$  or  $< 45$  months).

| Definitions | AUC (95% CI)                              |                                        |
|-------------|-------------------------------------------|----------------------------------------|
|             | PD duration $\geq 45$ months ( $n = 93$ ) | PD duration $< 45$ months ( $n = 93$ ) |
| AWGS 2019   |                                           |                                        |
| CC          | 0.831 (0.738–0.901) <sup>b</sup>          | 0.793 (0.697–0.869) <sup>a,b</sup>     |
| SARC-CalF   | 0.765 (0.665–0.847) <sup>c</sup>          | 0.713 (0.610–0.802) <sup>a,c</sup>     |
| SARC-F      | 0.577 (0.469–0.679) <sup>b,c</sup>        | 0.596 (0.490–0.696) <sup>b,c</sup>     |
| EWGSOP2     |                                           |                                        |
| CC          | 0.803 (0.707–0.878) <sup>b</sup>          | 0.747 (0.647–0.831)                    |
| SARC-CalF   | 0.775 (0.676–0.856) <sup>c</sup>          | 0.720 (0.618–0.808)                    |
| SARC-F      | 0.613 (0.505–0.712) <sup>b,c</sup>        | 0.636 (0.530–0.733)                    |
| FNIH        |                                           |                                        |
| CC          | 0.708 (0.604–0.798) <sup>b</sup>          | 0.584 (0.478–0.685)                    |
| SARC-CalF   | 0.683 (0.578–0.776) <sup>c</sup>          | 0.607 (0.501–0.706)                    |
| SARC-F      | 0.566 (0.458–0.669) <sup>b,c</sup>        | 0.604 (0.498–0.703)                    |
| IWGS        |                                           |                                        |
| CC          | 0.760 (0.660–0.843)                       | 0.740 (0.639–0.825)                    |
| SARC-CalF   | 0.726 (0.623–0.814) <sup>c</sup>          | 0.689 (0.585–0.781)                    |
| SARC-F      | 0.629 (0.522–0.727) <sup>c</sup>          | 0.605 (0.499–0.704)                    |

PD, peritoneal dialysis; AUC, area under curve; CI, confidence interval; CC, calf circumference; SARC-F, strength, assistance walking, rise from a chair, climb stairs, and falls; SARC-CalF, SARC-F combined with calf circumference; AWGS, Asian Working Group for Sarcopenia; CC, calf circumference; EWGSOP, European Working Group on Sarcopenia in Older People; FNIH, Foundation for the National Institutes of Health; IWGS, International Working Group on Sarcopenia. <sup>a</sup>  $p < 0.05$  indicates significant difference of AUCs between CC and SARC-CalF. <sup>b</sup>  $p < 0.05$  indicates significant difference of AUCs between CC and SARC-F. <sup>c</sup>  $p < 0.05$  indicates significant difference of AUCs between SARC-CalF and SARC-F.
